# Supplementary material for: Induction of AmpC-Mediated β-Lactam Resistance Requires a Single Lytic Transglycosylase in Agrobacterium tumefaciens
Source: Appl Environ Microbiol. 2022 May 31;88(12):e00333-22. doi: 10.1128/aem.00333-22 (PMC9238390; doi:10.1128/aem.00333-22)
Supplement: Supplemental file 1 — Fig. S1 to S4. Download aem.00333-22-s0001.pdf, PDF file, 2.6 MB [file aem.00333-22-s0001.pdf]

Induction of AmpC-mediated b-lactam resistance requires a single lytic transglycosylase in *Agrobacterium tumefaciens*

Wanda M. Figueroa-Cuilan<sup>1\*</sup>, Matthew Howell<sup>1&</sup>, Christopher Richards<sup>1</sup>, Amelia Randich<sup>1^</sup>, Akhilesh K. Yadav<sup>2\$</sup>, Felipe Cava<sup>2</sup>, and Pamela J.B. Brown<sup>1#</sup>

<sup>1</sup>Division of Biological Sciences, University of Missouri-Columbia, Columbia, Missouri, 65202

<sup>2</sup>Laboratory for Molecular Infection Medicine, Department of Molecular Biology, Umeå University, Umeå, Sweden

**Running title:** AmpC-mediated b-lactam resistance of *A. tumefaciens*

**#Corresponding author:**

[brownpb@missouri.edu](mailto:brownpb@missouri.edu)

(573) 884-0384

**Present addresses:**

\*Department of Biological Chemistry, Johns Hopkins University School of Medicine, Baltimore, Maryland 21205

&Department of Biology, Westminster College, Fulton, Missouri 65251

\$Analytical Chemistry Division, CSIR-Indian Institute of Toxicology Research, Lucknow-226001, India

^Department of Biology, The University of Scranton, Scranton, Pennsylvania, 18510

**Contents**

Supplemental Figures and Legends 1 – 4

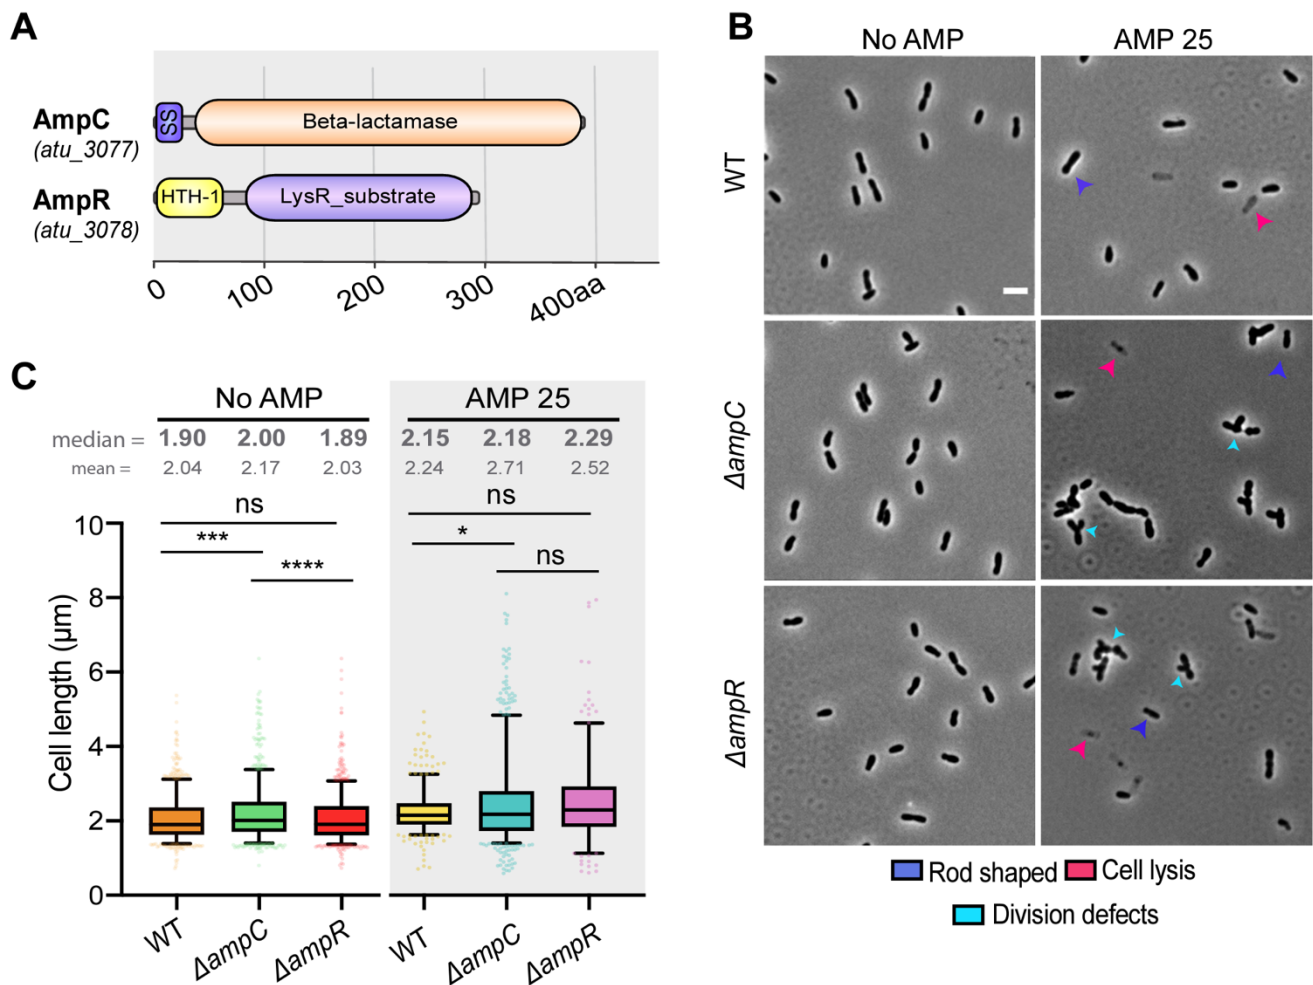

### Supplemental 1

**SUPPLEMENTAL FIG 1. Putative enzymes involved in ampicillin resistance in the plant pathogen, *A. tumefaciens* C58.** (A) Schematic representation of putative proteins involved in ampicillin resistance. Corresponding ORF numbers are indicated under the name of the protein. (B) Phase-contrast microscopy of exponentially-growing WT *A. tumefaciens* C58 and  $\Delta ampC$  and  $\Delta ampR$  incubated in the absence (No AMP) or presence of ampicillin 25  $\mu g/ml$  (AMP 25) for 2 h. Scale bar = 2  $\mu m$ . Arrows indicate major phenotypes; Blue = WT/Rod-shaped, magenta = cell lysis, cyan = division defects. (C) Box-plots represent the distribution of cell length in WT *A. tumefaciens* C58,  $\Delta ampC$ , and  $\Delta ampR$  of untreated cells (No AMP) and treated with ampicillin 25  $\mu g/ml$  (AMP 25) for 2 h before imaging. Top number represents the median cell length. Top quartile (Q1) indicates 75% of the population, middle line represents the median, and bottom quartile (Q2) represents the 25% of the population. Whiskers indicate 5-95% of population. Significance of the cell length distributions are indicated using the non-parametric Kruskal-Wallis test followed by a Dunn posthoc analysis (\* =  $P < 0.1$ ; \*\*\* =  $P < 0.001$ ; \*\*\*\* =  $P < 0.0001$ ; ns = not significant).

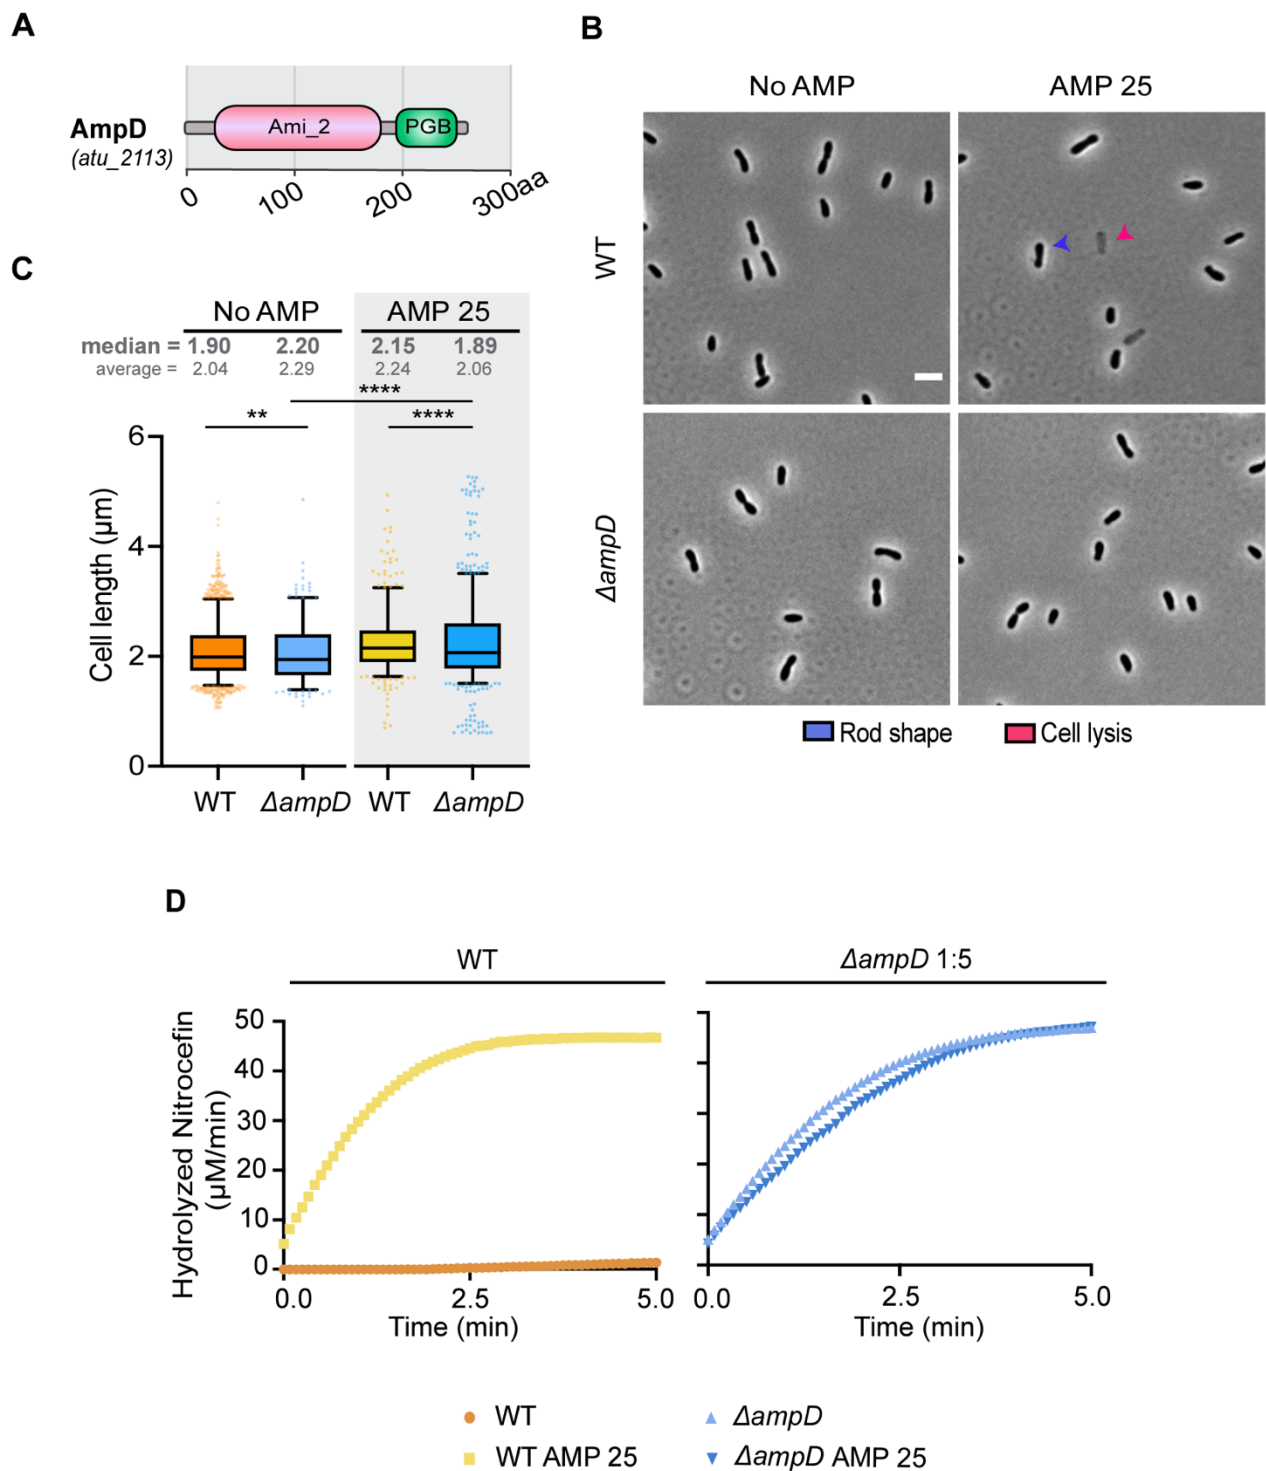

## Supplemental 2

**SUPPLEMENTAL FIG 2. Loss of AmpD leads to ampicillin resistance.** (A) Schematic representation of putative proteins involved in ampicillin resistance. Corresponding ORF numbers are indicated under the name of the protein. (B) Phase-contrast microscopy of exponentially growing WT *A. tumefaciens* C58 and  $\Delta ampD$  incubated in the absence (No AMP) or presence of ampicillin 25  $\mu$ g/ml (AMP 25) for 2 h. Scale bar = 2  $\mu$ m. Arrows indicate major phenotypes; Blue = WT/Rod-shaped, magenta = cell lysis. (C) Box-plots represent the distribution of cell length in WT *A. tumefaciens* C58 and  $\Delta ampD$  of untreated cells (No AMP) and treated with ampicillin 25  $\mu$ g/ml (AMP 25) for 2 h before imaging. Distribution of cell lengths was obtained using MicrobeJ (87). Top number represents the median cell length. Top quartile (Q1)

indicates 75% of the population, middle line represents the median, and bottom quartile (Q2) represents the 25% of the population. Whiskers indicate 5-95% of population. Significance of the cell length distributions are indicated using the non-parametric Kruskal-Wallis test followed by a Dunn posthoc analysis (\* =  $P < 0.1$ ; \*\* =  $P < 0.01$ , \*\*\* =  $P < 0.001$ , \*\*\*\* =  $P < 0.0001$ ). **(D)**

Determination of  $\beta$ -lactamase production was performed via a nitrocefin assay using cell lysates. “No AMP” or “AMP 25” indicates cells untreated or treated, respectively, with ampicillin 25  $\mu\text{g/ml}$  for 2 h before the generation of cell lysates.  *$\Delta ampD$*  lysates were normalized based on total protein content (7.5  $\mu\text{g/ml}$ ) and subsequently diluted to 1:5 as the rate of nitrocefin hydrolysis was significantly faster than the controls (WT, WT AMP 25) (n=1).

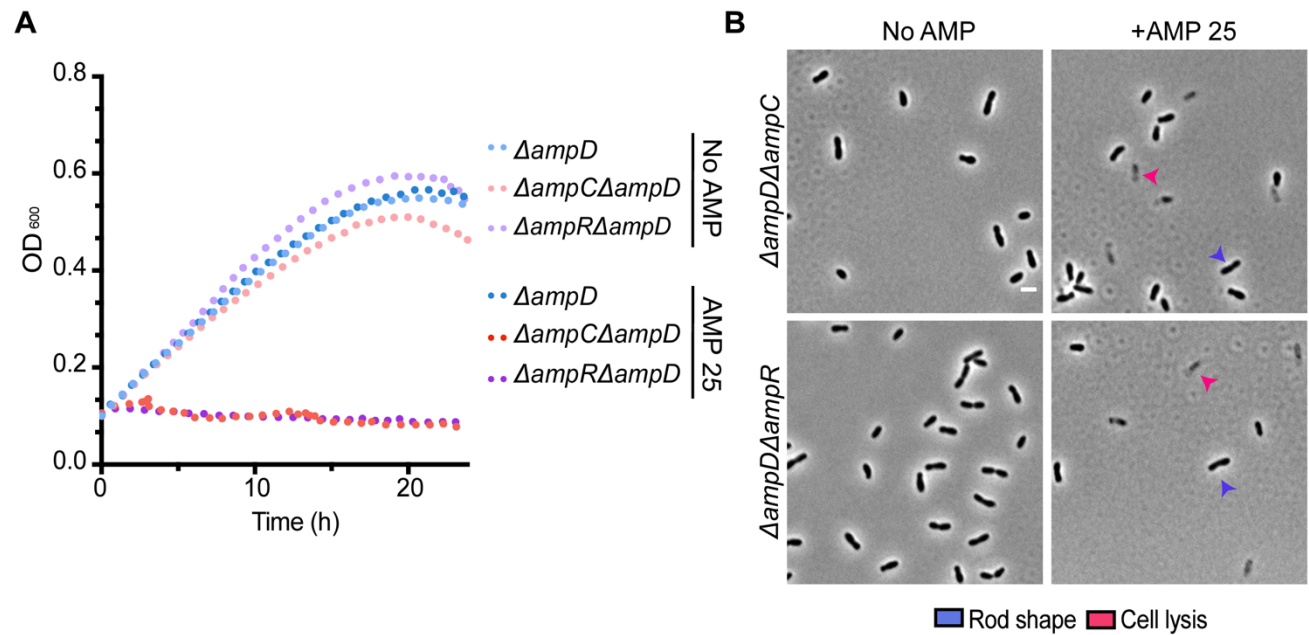

### Supplemental 3

**SUPPLEMENTAL FIG 3. Loss of AmpD results in constitutive  $\beta$ -lactamase production activity and elevated ampicillin resistance. (A)** Growth of *A. tumefaciens* strains in the absence (No AMP) and presence (AMP) of ampicillin 25  $\mu$ g/ml (AMP 25) for 24 h (n=1, 2 replicates). **(B)** Phase-contrast microscopy of exponentially-growing strains treated with ampicillin 25  $\mu$ g/ml (AMP 25) for 2 h.

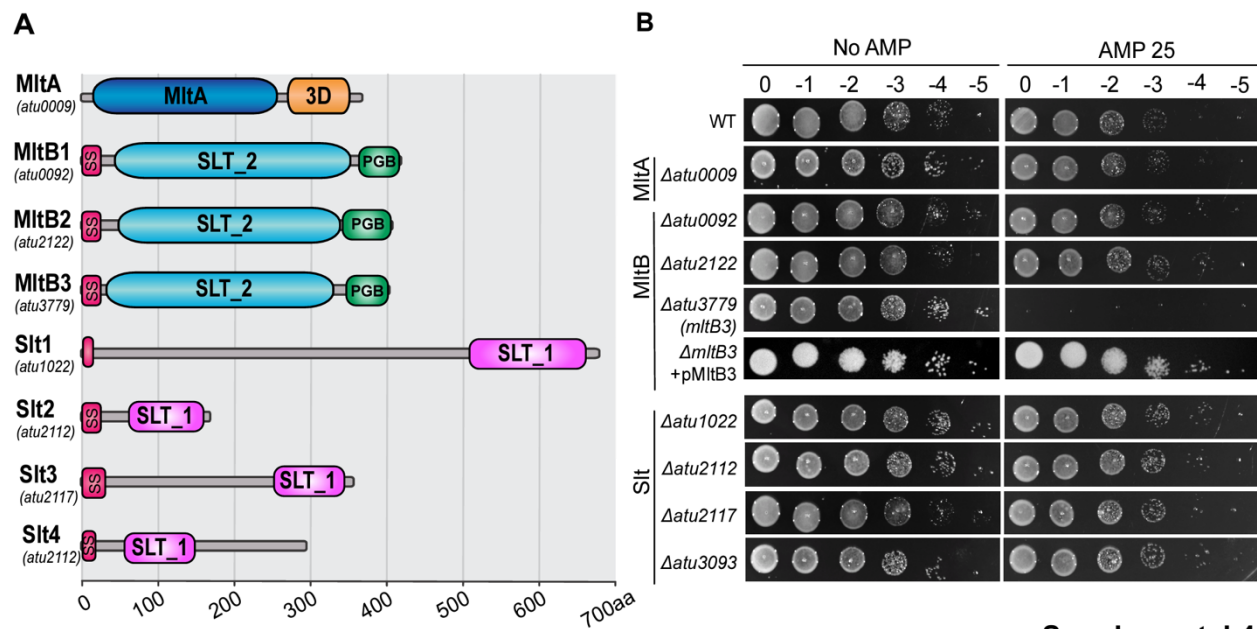

Supplemental 4

**SUPPLEMENTAL FIG 4. MltB3 is required for *A. tumefaciens* natural resistance to ampicillin.** (A) Domain organization of predicted lytic transglycosylase (LT) proteins.

(B) Ampicillin susceptibility assay was performed via spotting dilutions. Briefly, indicated strains were cultured ON at 28°C, serially diluted, spotted on solid medium containing no ampicillin (No AMP) or ampicillin 25  $\mu$ g/ml (AMP 25), and incubated at 28C for 36 h before imaging. Plates used to demonstrate complementation of  $\Delta$ mltB3 ( $\Delta$ mltB3 +pMltB3) included 1 $\mu$ M IPTG to induce expression of plasmid encoded MltB.
